# Supplementary material
Source: PubMed Central journal article supplement (PMC3811834)

# Augmenting Epithelial Resistance to Invading Bacteria

## using mRNA Transfections

Xianqiong Zou<sup>1</sup>, Brent S. Sorenson<sup>1</sup>, Karen F. Ross<sup>1,2</sup>, and Mark C. Herzberg<sup>1,2,†</sup>

<sup>1</sup>Department of Diagnostic and Biological Sciences, School of Dentistry, University of Minnesota, Minneapolis, MN 55455, USA.

<sup>2</sup>Mucosal and Vaccine Research Center, Minneapolis VA Medical Center, Minneapolis, Minnesota 55417

<sup>†</sup>correspondence and reprint requests to: Dr. Mark C. Herzberg, Department of Diagnostic and Biological Sciences, School of Dentistry University of Minnesota, 17-164 Moos Tower, 515 Delaware St., SE, Minneapolis, MN 55455 USA, Tel: 1 (612) 625-8404; Fax: 1 (612) 626-2651; E-mail: mcherzb@umn.edu

## SUPPLEMENTAL INFORMATION

**Quantitative Real-time Polymerase Chain Reaction Analysis.** RNA was isolated using Trizol reagent (Life Technologies) and RNeasy plus Mini-kits (Qiagen, Valencia, CA). Total RNA was reverse transcribed with Superscript III (Life Technologies). Quantitative Real-time Polymerase Chain Reaction (qRT-PCR) was performed using PrimeTime pre-designed qRT-PCR assays (Hs.PT.42.1073747 for human *CAMP*, Hs.PT.42.3682141 for human *S100A8*, Hs.PT.42.3080635 for human *S100A9*, Hs.PT.45.227970.g for human *ACTB*; Integrated DNA Technologies, Coralville, Iowa). The expression levels of *CAMP*, *S100A8*, *S100A9* *A8-IRES-A9* and *A8-nIRES-A9* mRNA were normalized to *ACTB* mRNA.

**Immunofluorescence.** At 16 h after *CAMP* or *S100A8/S100A9* mRNA transfection, cells were fixed with 4% paraformaldehyde for 10 min, washed with PBS (pH 7.4), and then permeabilized with 0.25% Triton X-100 for 10 min. After blocking for 1 h with 1% BSA in PBS/0.1% Tween 20 and rinsing 3X with PBS, cells were incubated with mouse anti-calprotectin (mAb 27E10, sc-33714, Santa Cruz Biotechnology) or mouse anti-LL37 (sc-166770, Santa Cruz Biotechnology) for 1 h, followed by Alexa Fluor 568-conjugated goat anti-mouse IgG or Alexa Fluor 488-conjugated goat anti-rabbit IgG (Life Technologies) for 1 h. For *EGFP* mRNA transfection, no antibody incubation was needed. Nuclei were stained with DAPI. Fluorescence images were captured using an epifluorescence microscope system. *A8-IRES-A9* and *A8-nIRES-A9* mRNA transfection for 40 h was also performed.

36

37 **Supplementary Table 1: Oligonucleotides Probes**

| Name                                                                |                  | Oligonucleotide sequence (5'-3') <sup>a</sup>  |
|---------------------------------------------------------------------|------------------|------------------------------------------------|
| <i>Primers for fragments cloned into pGEM4Z. 2bgUTR.150A vector</i> |                  |                                                |
| <i>EGFP</i>                                                         | <i>sense</i>     | <u>CCTAAGCTTGCCACCATGGT</u> GAGCAAGGG          |
|                                                                     | <i>antisense</i> | ATTGCGGCCGCTTACTTGTACAGCTCGTCCATGCCGAG         |
| <i>CAMP</i>                                                         | <i>sense</i>     | <u>CCTAAGCTTGCCACCATGAAGACCCAAAGGGATGGCC</u>   |
|                                                                     | <i>antisense</i> | ATTGCGGCCGCTTAGGACTCTGTCCTGGGTACAAGATTCC       |
| <i>S100A8</i>                                                       | <i>sense</i>     | <u>CCTAAGCTTGCCACCATGTTGACCGAGCTGGAGAAAGCC</u> |
|                                                                     | <i>antisense</i> | ATTGCGGCCGCTACTCTTTGTGGCTTTCTTCATGGC           |
| <i>S100A9</i>                                                       | <i>sense</i>     | <u>CCTAAGCTTGCCACCATGACTTGCAAAATGTCGCAGCTG</u> |
|                                                                     | <i>antisense</i> | ATTGCGGCCGCTTAGGGGGTGCCCTCCCC                  |
| <i>A8-IRES-A9</i>                                                   | <i>sense</i>     | <u>CCTAAGCTTGCCACCATGTTGACCGAGCTGGAGAAAGCC</u> |
|                                                                     | <i>antisense</i> | ATTGCGGCCGCTTAGGGGGTGCCCTCCCC                  |
| <i>Primers for fragments cloned into pIRES vector</i>               |                  |                                                |
| <i>S100A8</i>                                                       | <i>sense</i>     | CTAGCTAGCGCCACCATGTTGACCGAGCTGGAGAAAGC         |
|                                                                     | <i>antisense</i> | CCGCTCGAGCTACTCTTTGTGGCTTTCTTCATGGC            |
| <i>S100A9</i>                                                       | <i>sense</i>     | <u>GCTCTAGAGCCACCATGACTTGCAAAATGTCGCAGCTG</u>  |
|                                                                     | <i>antisense</i> | ATTGCGGCCGCTTAGGGGGTGCCCTCCCC                  |

38 <sup>a</sup>Regions of oligonucleotide not derived from the genes/fragments are underlined.

**Figure S1. CAMP protein expression after KB cells were transfected with ARCA, CE cap0 or cap1-capped CAMP mRNA.** Upper, representative Western blot. Lower, quantitative interpretation, with ARCA cap expression at 8h arbitrarily set to 100. Intensity levels of each band are normalized to  $\beta$ -actin. Bars show the means  $\pm$  SD of three to six independent experiments.

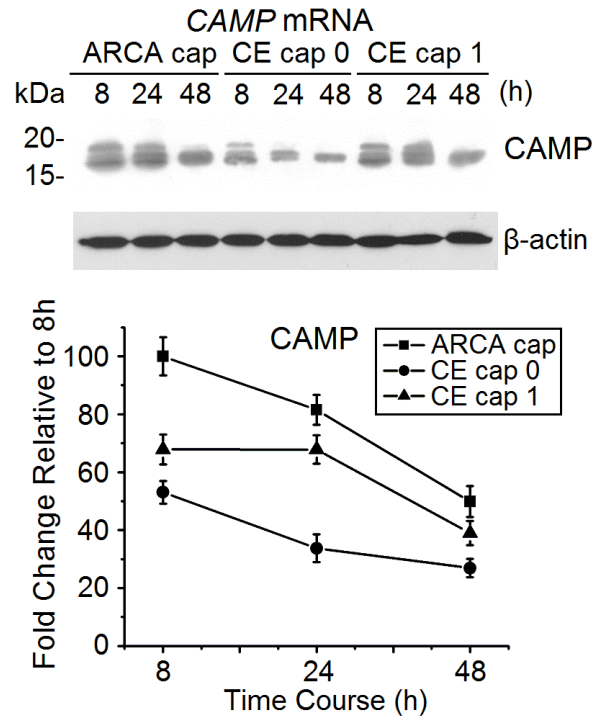

**Figure S2. Real-time PCR analysis of mRNAs delivery into KB cells showing message decay.** Relative quantitation of AMP mRNA was carried out as described in the Materials and Methods. **A.** *CAMP* mRNA transfection. **B.** *S100A8/S100A9* mRNA (mol/mol=1:1) cotransfection. **C.** *A8-IRES-A9* mRNA transfection. **D.** *A8-nIRES-A9* mRNA transfection. *A8-IRES-A9* and *A8-nIRES-A9* mRNA were detected by *S100A9* primers. mRNA abundance at 4h after mRNA transfection was assigned the arbitrary value of 100%. Bars show the means  $\pm$  SD of three to six independent experiments.

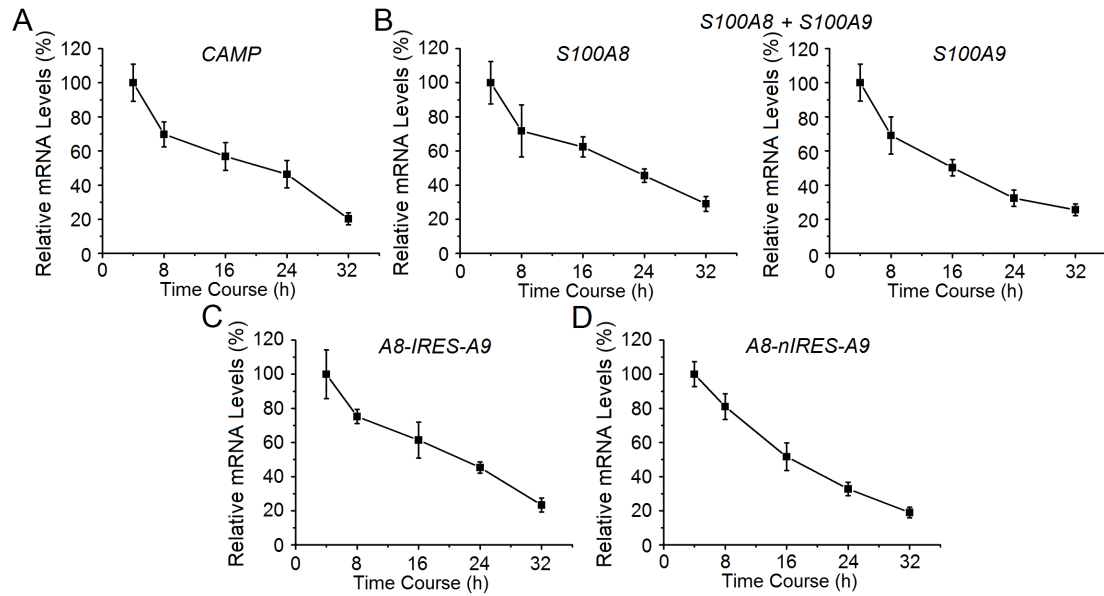

**Figure S3. Immunofluorescence evidence of new protein expression after mRNA transfection.** Immunofluorescent microscopy images of (A) *EGFP* mRNA transfection for 16h. (B) *CAMP* mRNA transfection for 16h. (C) *S100A8/S100A9* mRNA (mol/mol = 1:1) cotransfection for 16h, (D) *A8-IRES-A9* and *A8-nIRES-A9* mRNA transfection for 16h, (E) *A8-IRES-A9* and *A8-nIRES-A9* mRNA transfection for 40h. Vehicle, PBS. Bar = 10  $\mu$ M. The experiments were performed three times and representative images are shown.

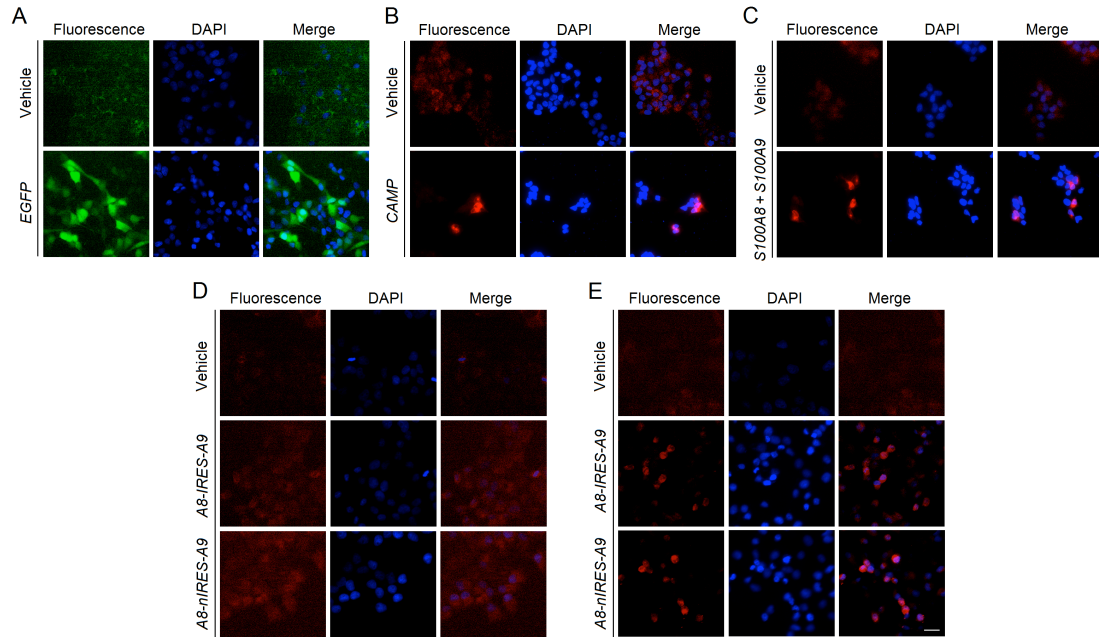

Supplement: IAI.00539-13_zii999090354so4.pdf [file IAI.00539-13_zii999090354so4.pdf]
