# Supplementary material
Source: PubMed Central journal article supplement (PMC3811834)

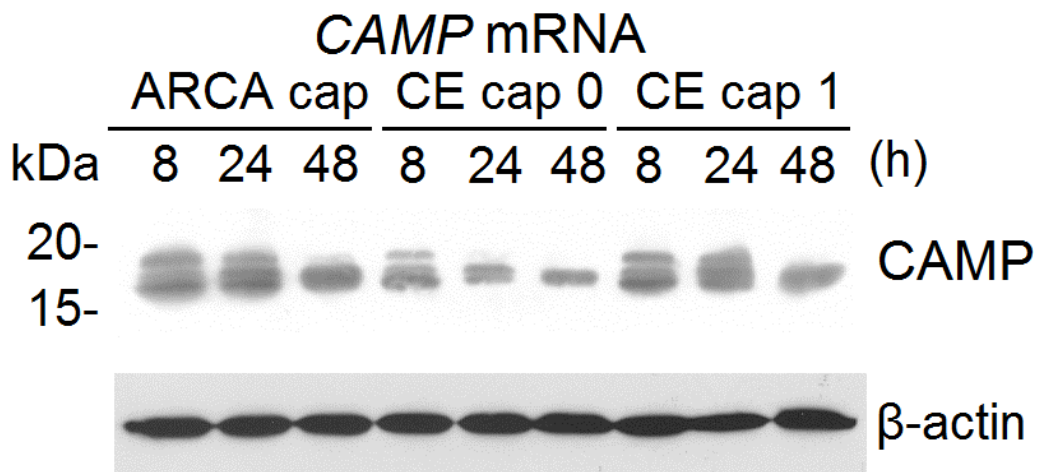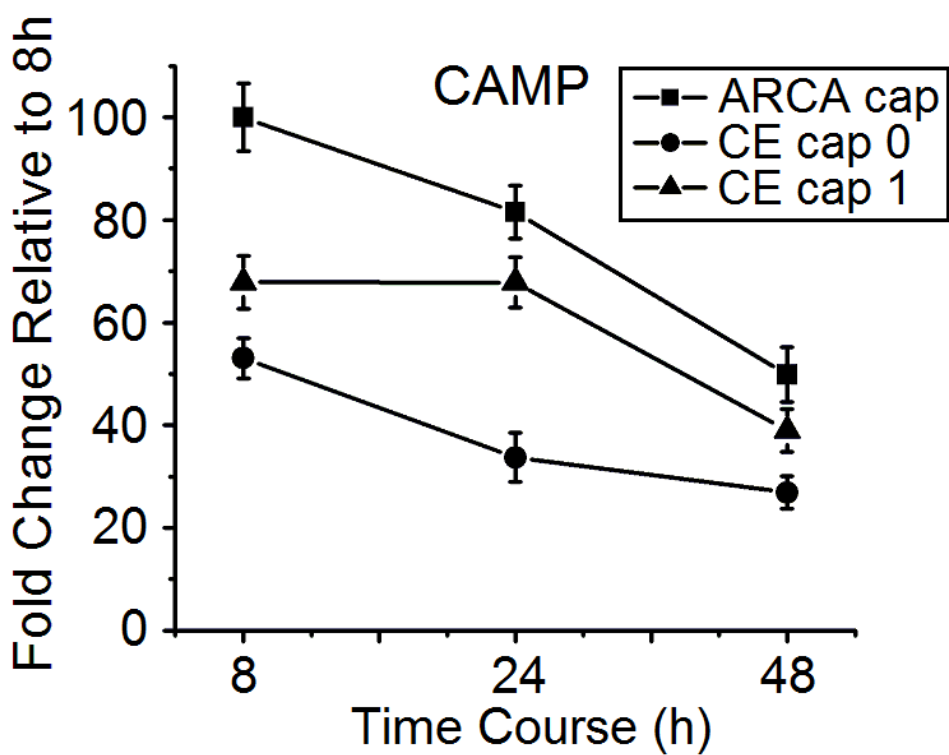

Supplement: IAI.00539-13_zii999090354so1.pdf [file IAI.00539-13_zii999090354so1.pdf]

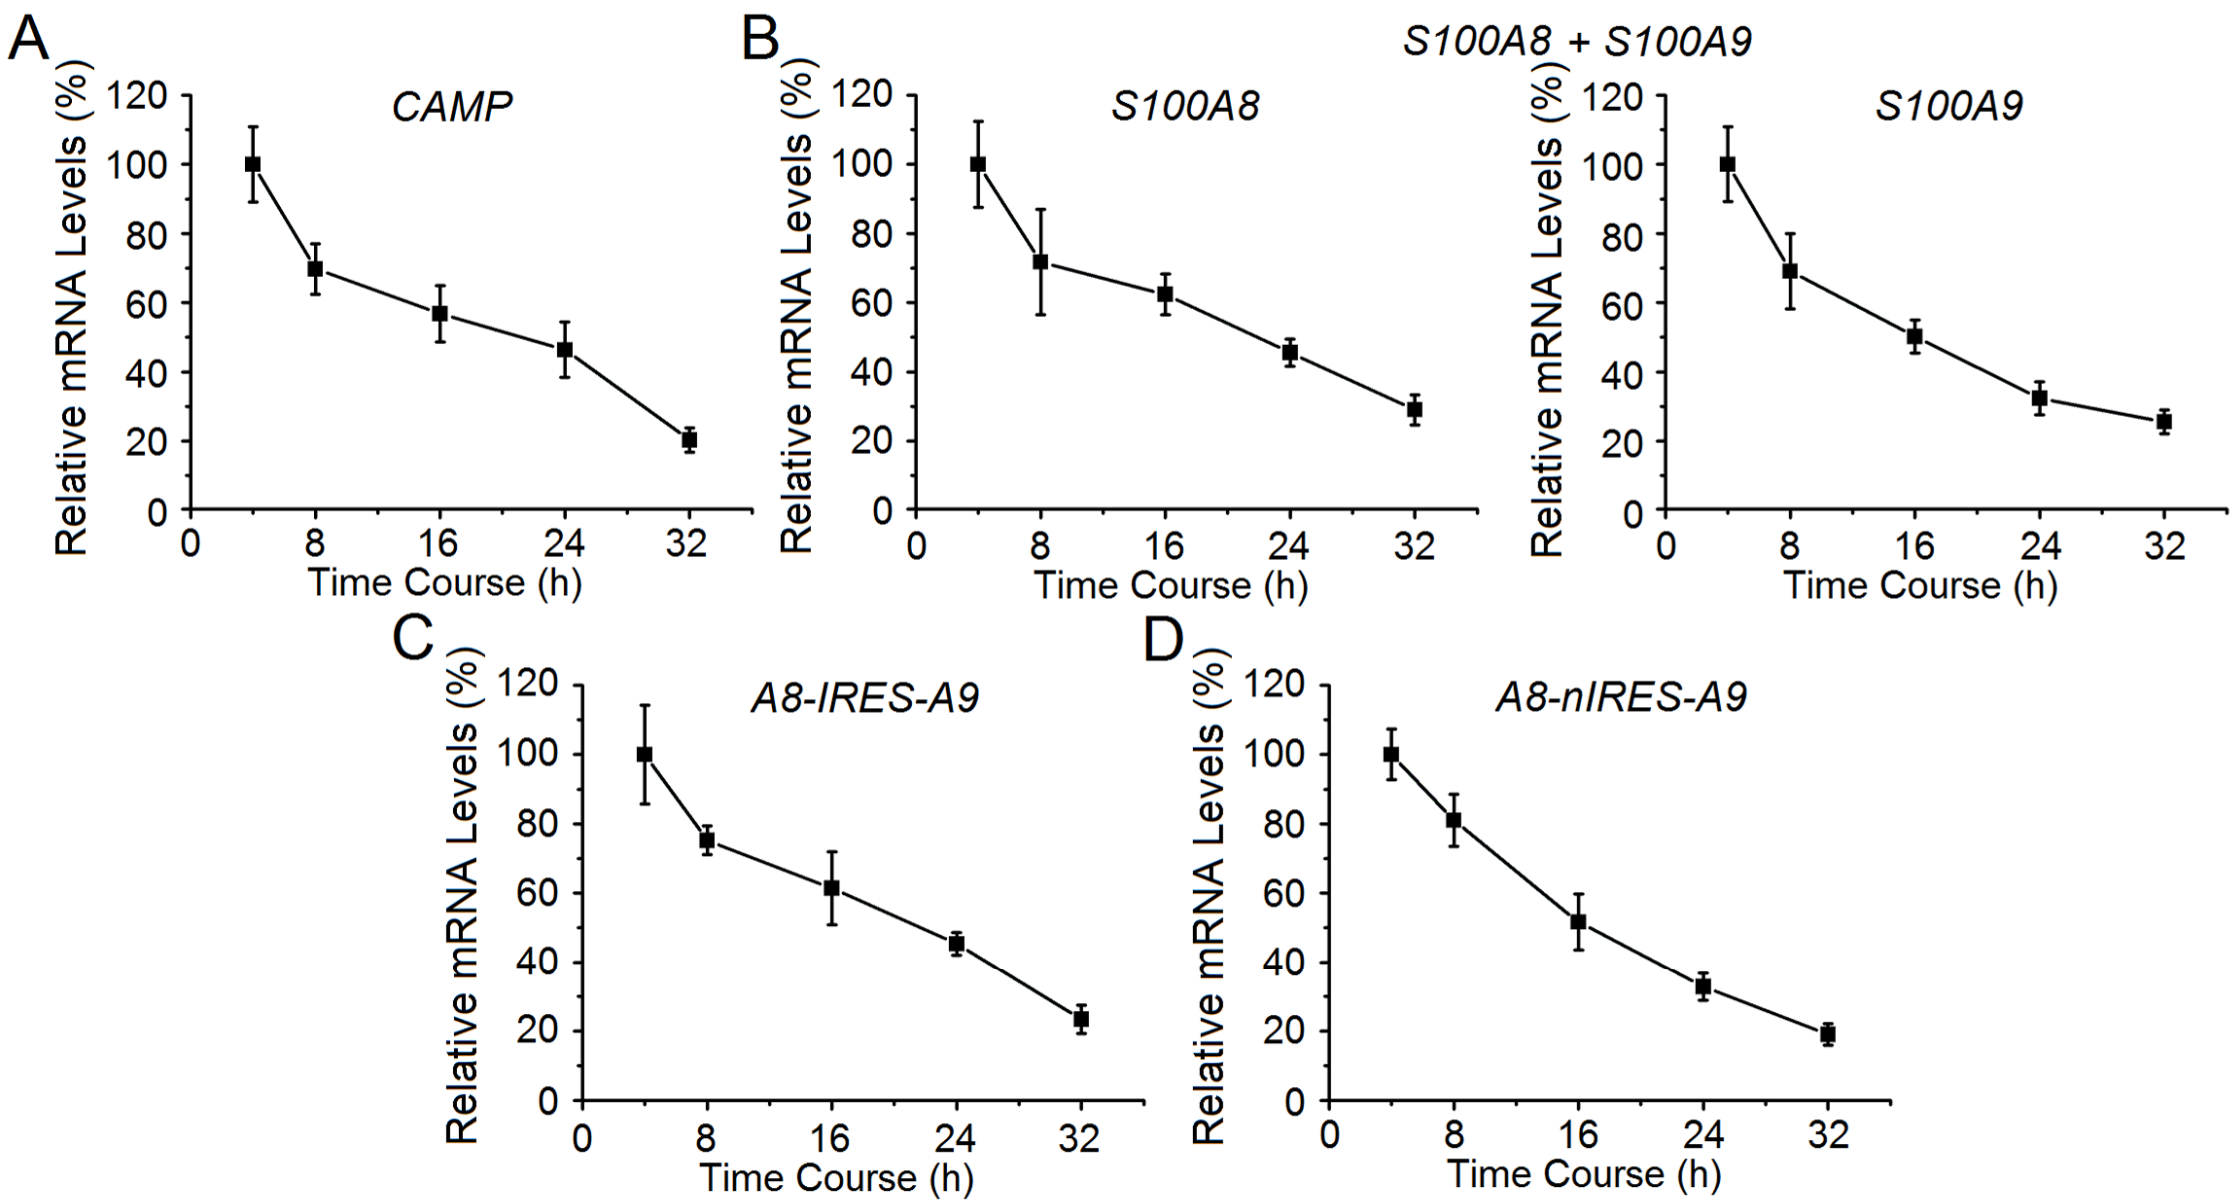

Supplement: IAI.00539-13_zii999090354so2.pdf [file IAI.00539-13_zii999090354so2.pdf]

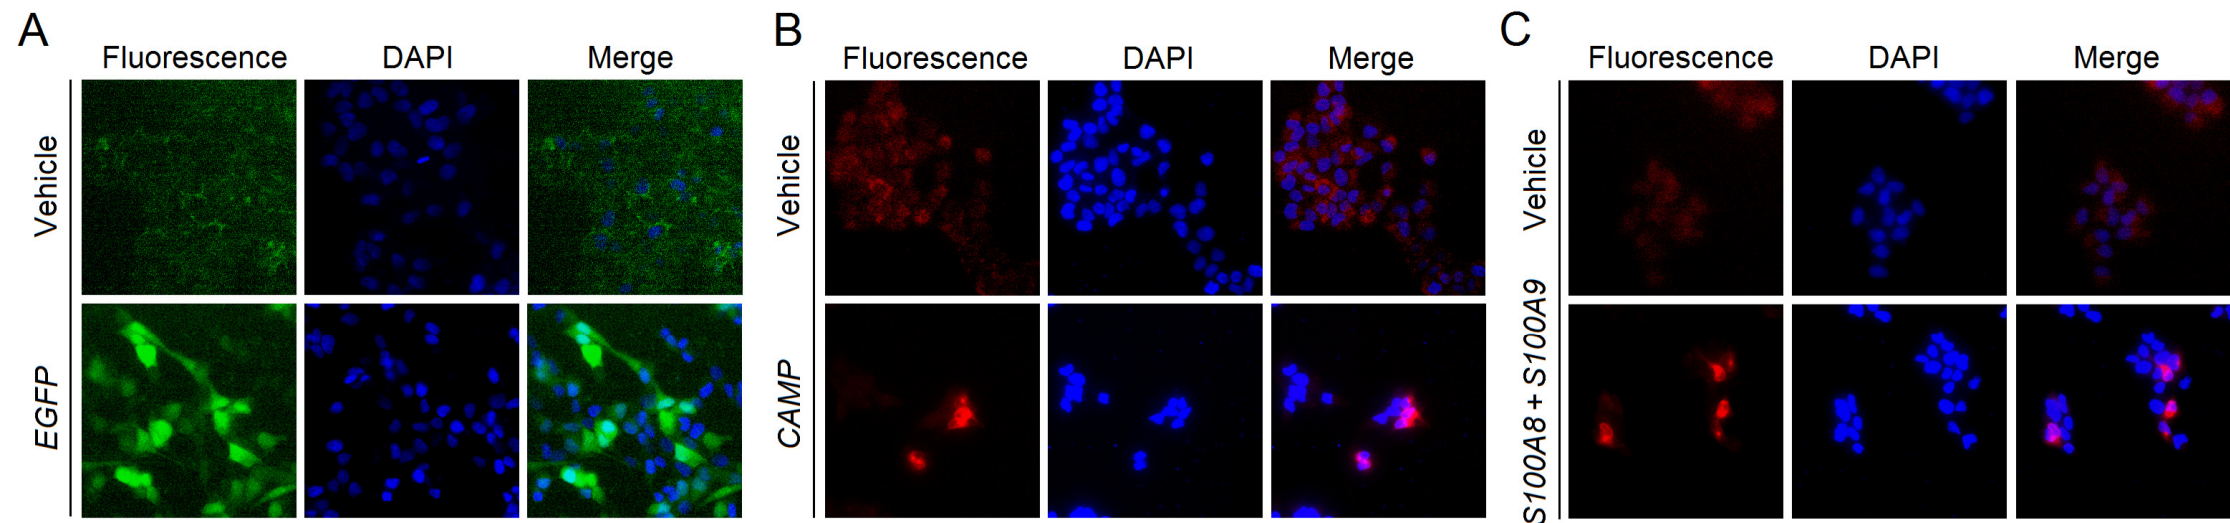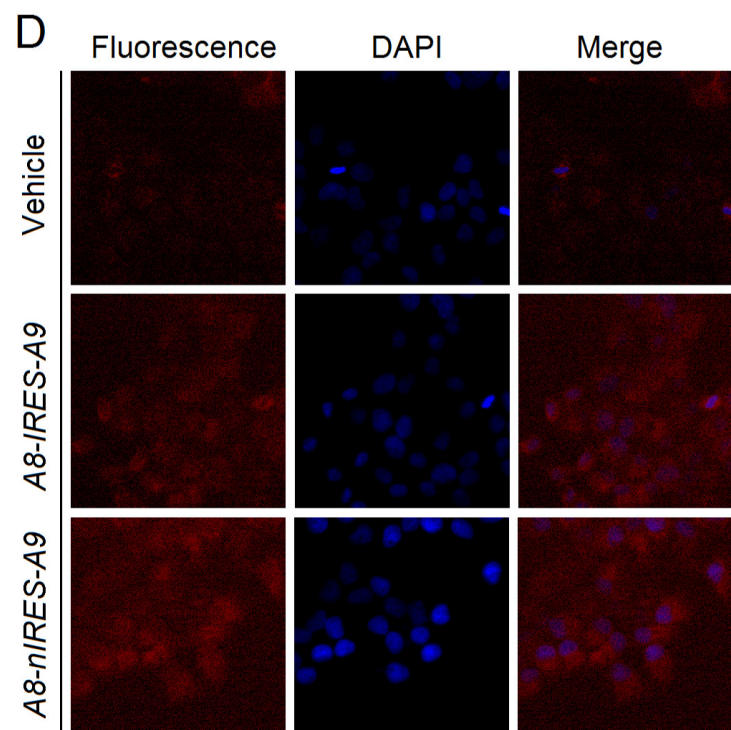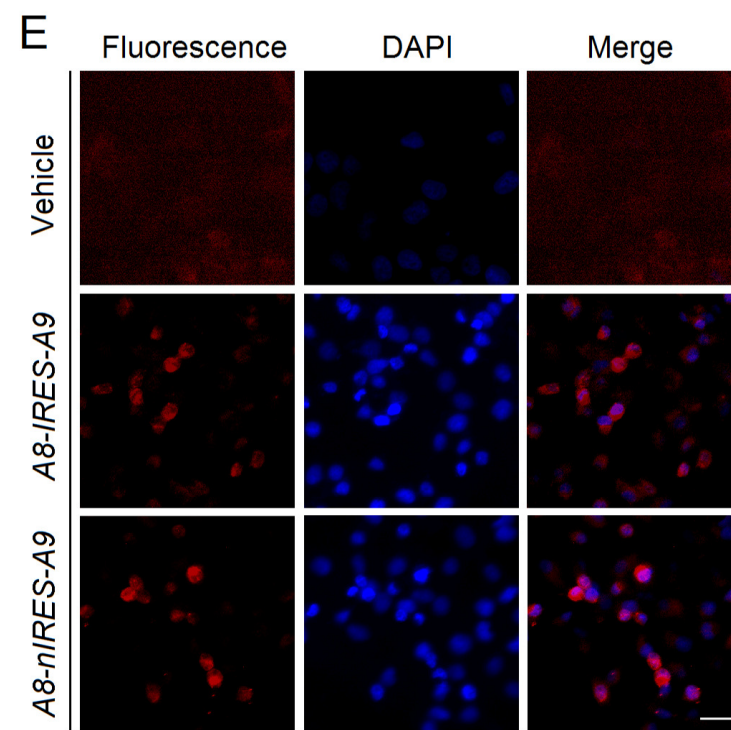

Supplement: IAI.00539-13_zii999090354so3.pdf [file IAI.00539-13_zii999090354so3.pdf]
